# Supplementary material
Source: PubMed Central journal article supplement (PMC5886827)
Supplement: NIHMS917638-supplement-supplement_1.pdf [file NIHMS917638-supplement-supplement_1.pdf]

Supplementary Table 1. Raw correlations for NO<sub>2</sub> above 8ppb on spirometry and asthma outcomes in school age children with asthma

| Variable               | Pearson correlation coefficient |
|------------------------|---------------------------------|
| FEV <sub>1</sub> /FVC  | -0.22                           |
| FEV <sub>1</sub> %     | -0.15                           |
| FVC%                   | -0.03                           |
| FEF <sub>25-75</sub> % | -0.20                           |
| FeNO                   | 0.05                            |

FEV<sub>1</sub>: forced expiratory volume in 1 second; FVC: forced vital capacity; FEF<sub>25-75</sub>: forced expiratory flow between the 25th and 75th percent of FVC; FeNO: fractional exhaled Nitric Oxide.

Supplementary Table 2. Effect of NO<sub>2</sub> above 8 ppb on spirometry and asthma outcomes in school age children with asthma stratified by atopy<sup>b</sup>

|                                   | Non-atopic |                              | Atopic     |                              |
|-----------------------------------|------------|------------------------------|------------|------------------------------|
|                                   | Odds ratio | 95% Confidence interval (CI) | Odds ratio | 95% Confidence interval (CI) |
| Maximum Symptom Days <sup>a</sup> | 1.32       | 0.70, 2.51                   | 1.01       | 0.67, 1.54                   |
|                                   | Beta       | 95% CI                       | Beta       | 95% CI                       |
| FEV <sub>1</sub> /FVC             | -0.052*    | -0.080, -0.025               | -0.051***  | -0.095, -0.007               |
| FEV <sub>1</sub> %                | -10.1**    | -16.8, -3.4                  | -4.2       | -13.8, 5.3                   |
| FVC%                              | -2.5       | -7.8, 2.7                    | -0.2       | -7.3, 7.7                    |
| FEF <sub>25-75</sub> %            | -30.2*     | -47.2, -13.3                 | -23.4***   | -41.9, -4.9                  |
| FeNO                              | -3.8       | -12.9, 5.3                   | 6.1        | -7.8, 20.0                   |

\*p<0.001, \*\*p<0.001, \*\*\*p<0.01.<sup>a</sup>Maximum symptom days = the greatest result of the following three variables in the 2 weeks prior to each follow-up survey: 1) number of days with wheezing, chest tightness, or cough; 2) number of days on which child had to slow down or discontinue play activities due to wheezing, chest tightness, or cough, and; 3) number of nights with wheezing, chest tightness, or cough leading to disturbed sleep; <sup>b</sup>Maximum symptom days adjusted for Age, Race, Gender and season; spirometry and FeNO adjusted for race and time. Results scaled to each 10 ppb increment of NO<sub>2</sub>. FEV<sub>1</sub>: forced expiratory volume in 1 second; FVC: forced vital capacity; FEF<sub>25-75</sub>: forced expiratory flow between the 25<sup>th</sup> and 75<sup>th</sup> percent of FVC; FeNO: fractional exhaled Nitric Oxide.
